# Supplementary material for: Discovery, Pharmacological Characterisation and NMR Structure of the Novel µ-Conotoxin SxIIIC, a Potent and Irreversible NaV Channel Inhibitor
Source: PubMed Central journal article supplement (PMC7599555; doi:10.3390/biomedicines8100391), 2020-10-02

## Supplementary Material

# Discovery, pharmacological characterisation and NMR structure of the novel $\mu$ -conotoxin SxIIIC, a potent and irreversible Nav channel inhibitor

Kirsten L. McMahon<sup>1</sup>, Hue N.T. Tran<sup>1</sup>, Jennifer R. Deuis<sup>1</sup>, Richard J. Lewis<sup>1</sup>, Irina Vetter<sup>1,2,\*</sup> and Christina I. Schroeder<sup>1,3,\*</sup>

<sup>1</sup> Institute for Molecular Bioscience, The University of Queensland, Brisbane, QLD 4072, Australia;

<sup>2</sup> The School of Pharmacy, The University of Queensland, Woolloongabba, QLD 4102, Australia;

<sup>3</sup> National Cancer Institute, National Institutes of Health, Frederick, MD 21702, USA

\* Correspondence: i.vetter@uq.edu.au (I.V.); christina.schroeder@nih.gov (C.I.S.)

**Figure S1: Activity of SxIIIC across Nav channel subtypes assessed by whole-cell patch-clamp electrophysiology.** Time course (current amplitude vs time) of SxIIIC at each subtype tested. Arrows indicate peptide addition at increasing concentrations following a 5 min buffer incubation. Currents were normalized to the buffer (0–100 s).

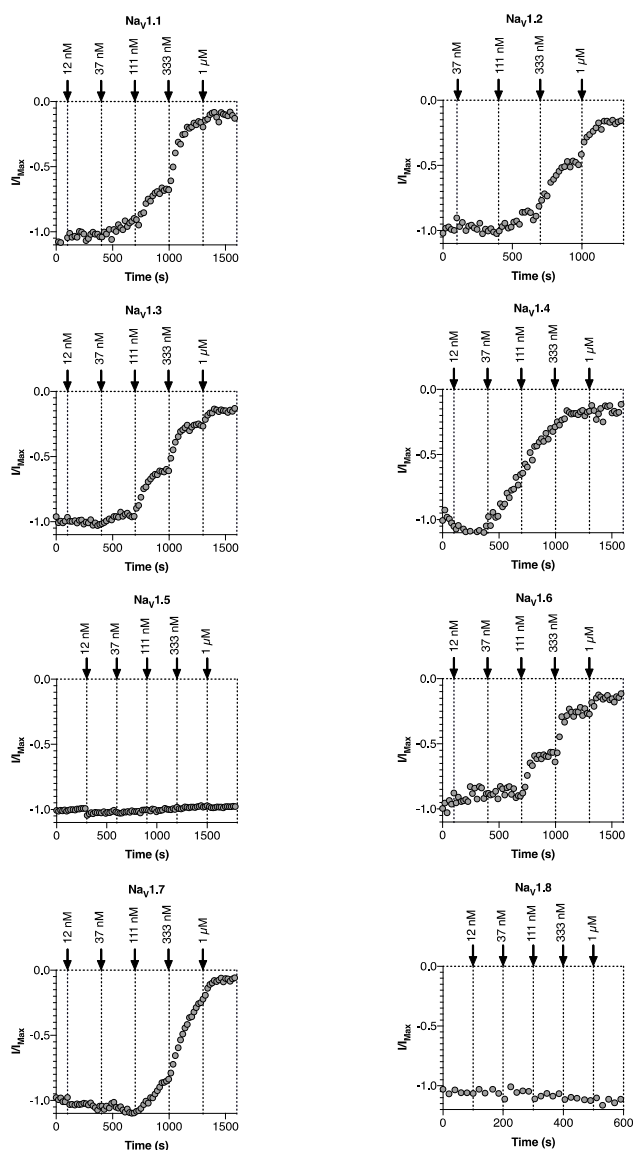

**Figure S2: SxIIIc superimposed over the KIIIA/Nav1.2 structure.** SxIIIc is represented by grey/purple surface, while the Nav1.2 channel is represented by ribbons with Domains I, II and III shown in blue, green and yellow, respectively. Insert shows a top view of this interaction in greater detail; residues from extracellular loop of Domain I (black labels) appear to clash with residues found on loop 1 of SxIIIc (white labels). The figure was generated in PyMol using the inbuilt function “super” to superimpose SxIIIc over KIIIA, in the KIIIA/Nav1.2 structure (PDB ID: 6J8E).

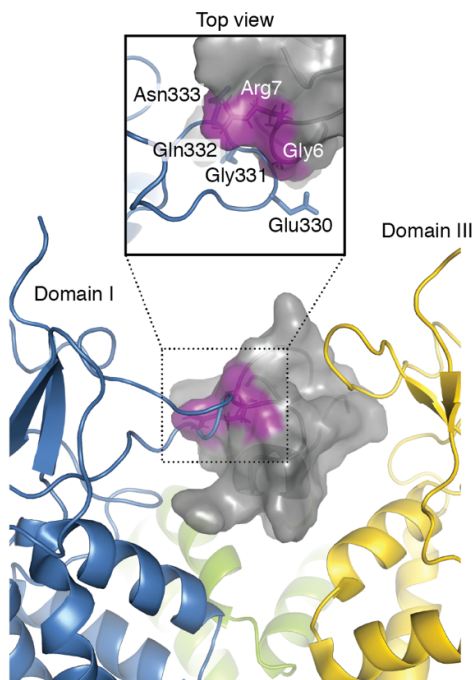

Supplement: biomedicines-08-00391-s001.pdf [file biomedicines-08-00391-s001.pdf]
